# Supplementary material for: PE_PGRS33 Contributes to Mycobacterium tuberculosis Entry in Macrophages through Interaction with TLR2
Source: PubMed Central journal article supplement (PMC4792380; doi:10.1371/journal.pone.0150800), 2016-03-15
Supplement: pone.0150800.s002.pdf [file pone.0150800.s002.pdf]

**S2 Fig. Schematic of the Rv1818c gene and PE\_PGRS33 protein domains and demonstration of PE\_PGRS33 expression in the complemented strain *Mtb*  $\Delta 33::PE\_PGRS33^{HA}$**

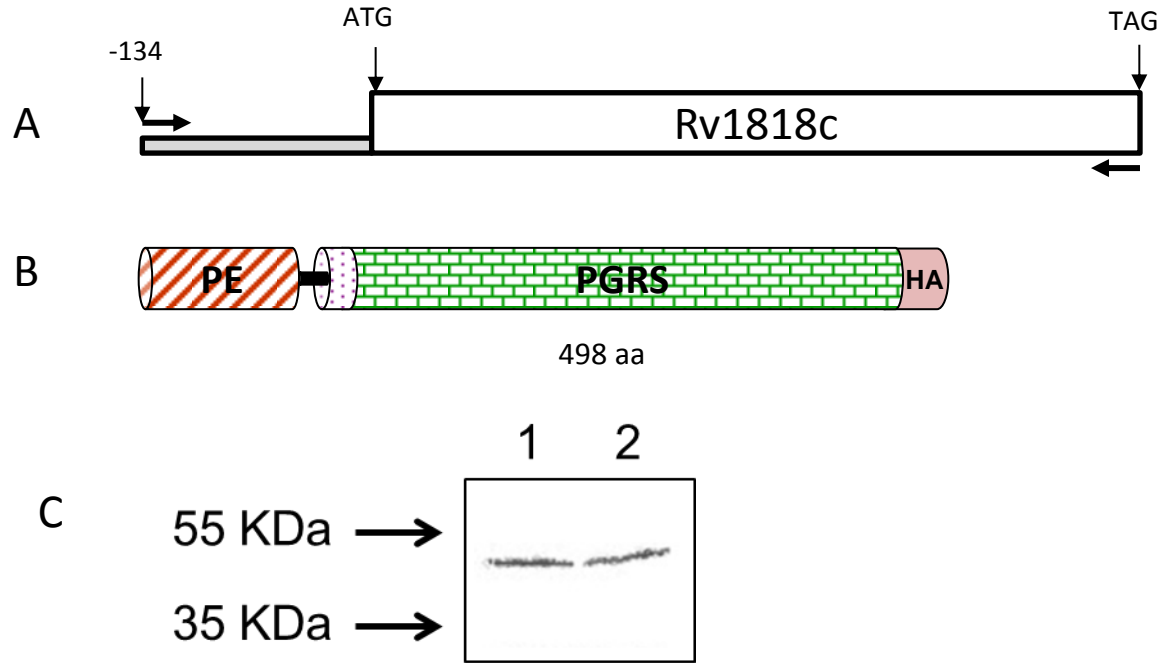

**S2 Fig. Schematic of the Rv1818c gene and PE\_PGRS33 protein domains and demonstration of PE\_PGRS33 expression in the complemented strain *Mtb*  $\Delta 33::PE\_PGRS33^{HA}$ .**

A) Schematic representation of the *Mtb* chromosomal region introduced in pMV306 containing the entire *rv1818c* fused with the sequence encoding for the HA epitope and preceded by its own promoter; B) schematic showing the major domains of the PE\_PGRS33<sup>HA</sup> used for complementation studies; C) lane 1: immunoblot confirming the expression of PE\_PGRS33<sup>HA</sup> in *Mtb* $\Delta 33$  after its complementation (*Mtb*  $\Delta 33::PE\_PGRS33^{HA}$ ); lane 2, a previously characterized merodiploid *Mtb* strain expressing PE\_PGRS33<sup>HA</sup> was used as a positive control (15).

Bacterial cells were mechanically disrupted using a Mini-Beadbeater (BioSpec Products). SDS-PAGE was performed according to standard protocols. Briefly, proteins were separated on 10%, polyacrylamide gels, and subsequently transferred to polyvinylidene fluoride membranes (PVDF; Bio-Rad). Proteins were visualized by immunoblotting using monoclonal antibodies directed against the HA epitope (Anti-HA.11; Covance, dilution 1:2000) as primary antibody and goat anti-mouse (Santa Cruz Biotechnology; dilution 1:2000) horseradish peroxidase conjugates as secondary antibody. Chemoluminescent signal was developed using the West Dura Signal Kit (Pierce). Image acquisition was performed using a Versadoc Imaging System (Bio-Rad).
